# Supplementary material for: Catalytic metallodendrimers grafted on mesoporous polymethacrylate beads for the regioselective synthesis of β-amino alcohols under solvent-free conditions
Source: Royal Society of Chemistry journal article supplement (doi:10.1039/c5ra04903b), 2015-01-01
Supplement: c5ra04903b1.pdf [file c5ra04903b1.pdf]

**Catalytic metallodendrimer grafted on mesoporous polymethacrylate beads for regioselective synthesis of  $\beta$ -amino alcohols under solvent-free conditions**

Richa Tiwari, Sachdeo Daware and Sandeep B. Kale\*

**\*Corresponding author**

Bioprocessing, Health, Nutrition and Chemistry Group, DBT-ICT-Centre for Energy Biosciences,  
Institute of Chemical Technology, NP Marg, matunga (E) Mumbai 400019, Maharashtra, India.  
sb.kale@ictmumbai.edu.in, sanykale@gmail.com, Tel: +91- 22- 33612313, Fax: +91- 2233611020

Supplementary Information

A) Scheme 2: Scheme for preparation G0, G1 and G2 series of metallodendritic side groups grafted polymethacrylate sepabeads catalysts

Series G0

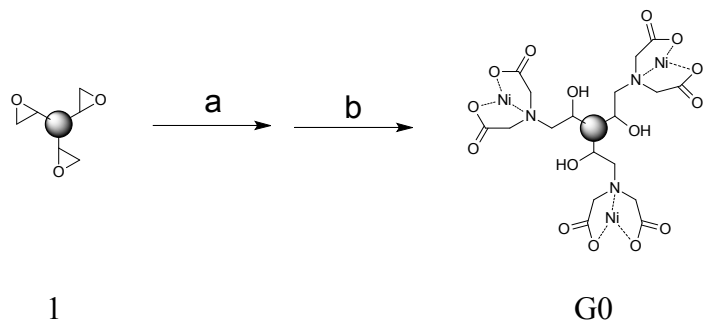

Series G1

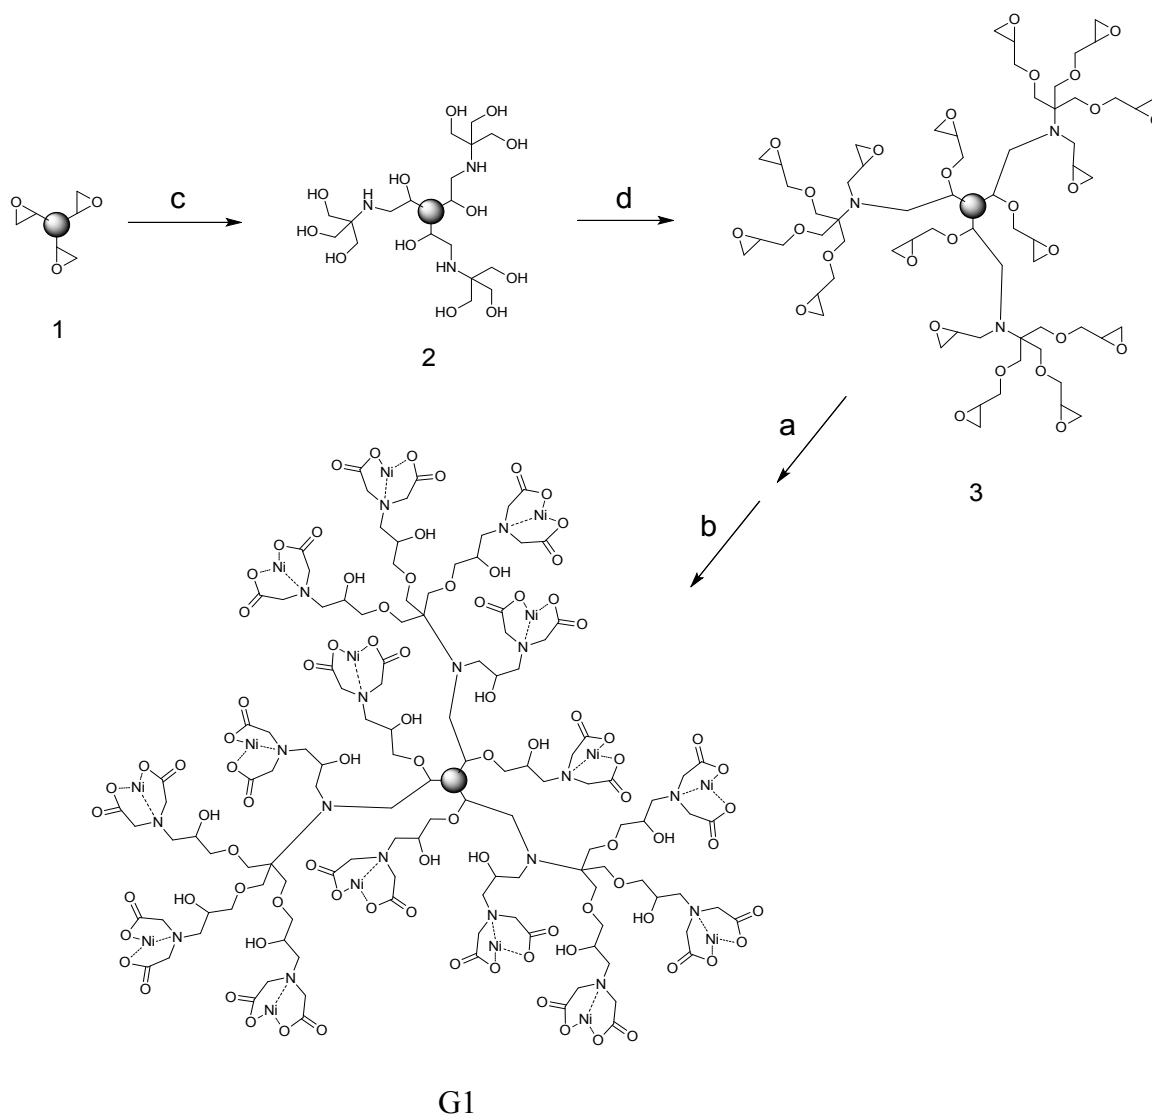

## Series G2

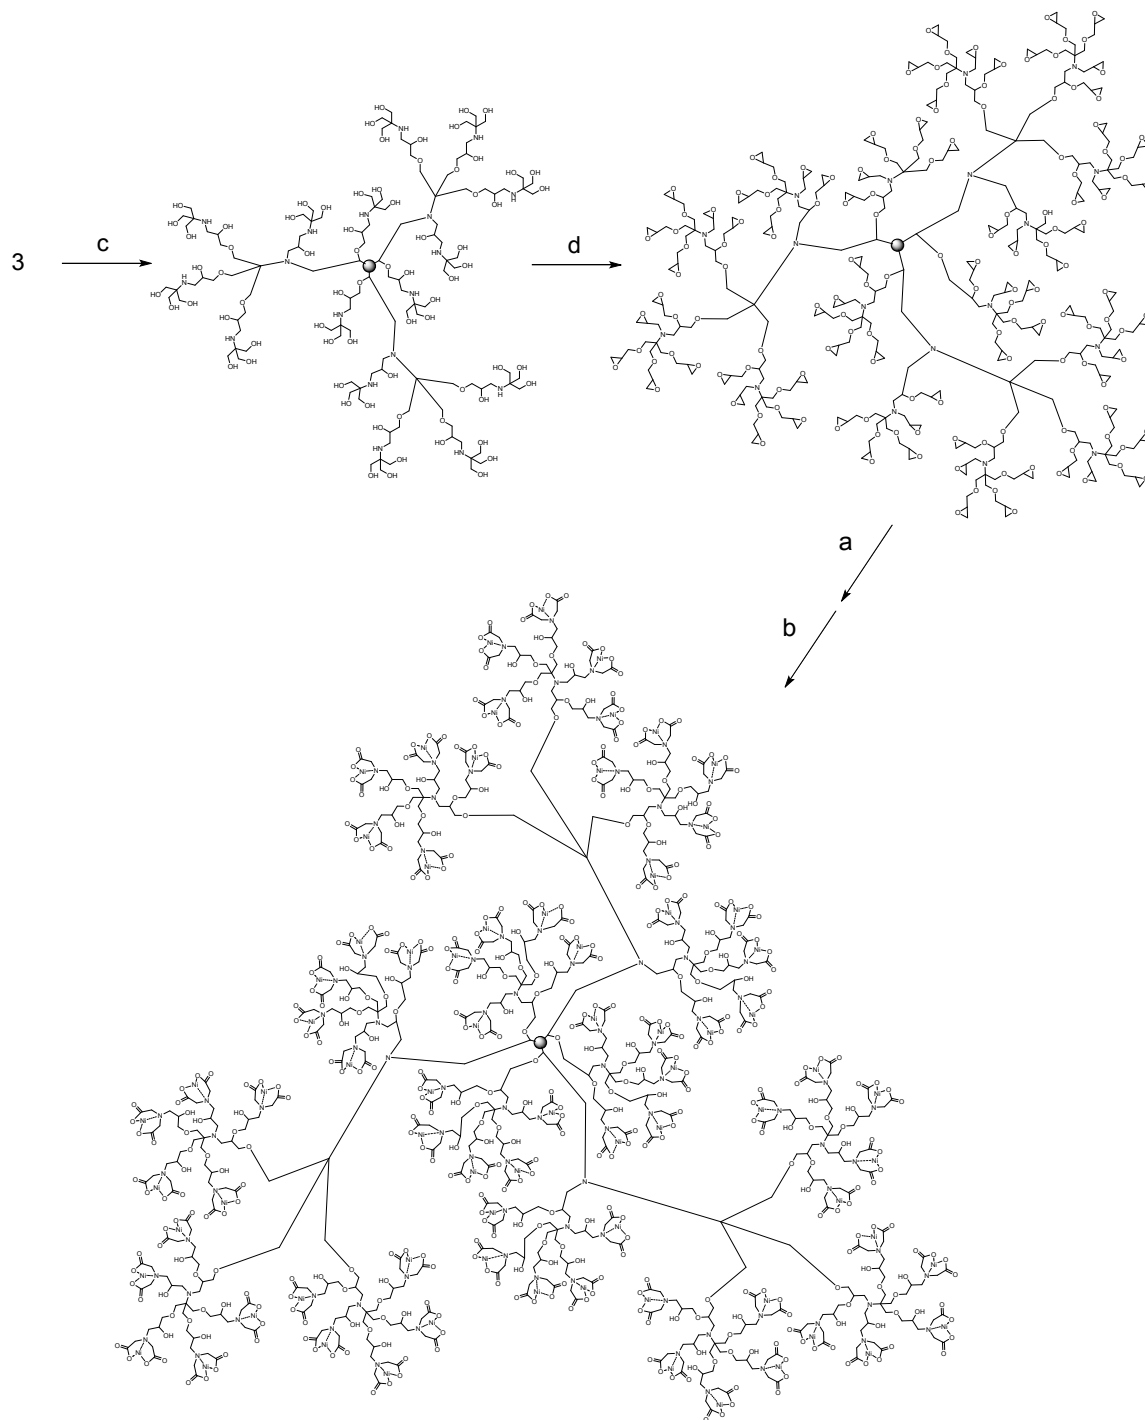

## G2

Reagents: a = IDA,  $\text{Na}_2\text{CO}_3$ ,  $60^\circ\text{C}$ , 48h; b = 0.5M solution of  $\text{NiSO}_4 \cdot 7\text{H}_2\text{O}$ ; c = Tris,  $\text{Na}_2\text{HPO}_4$ , pH12,  $60^\circ\text{C}$ , 48h; d = Epichlorohydrin,  $\text{NaBH}_4$ , RT, 48h

**B)** ATR-FTIR data of G0, G1 and G2 series of catalysts in comparison with starting material i.e. PMMA beads (Sepabeads EB-EP-400)

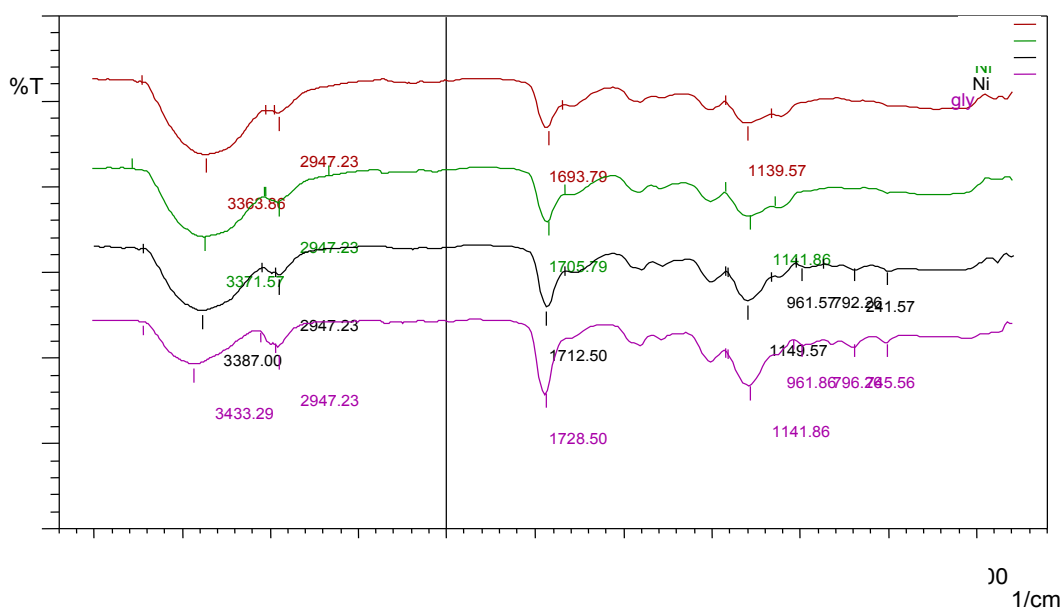

**C)** Conversion of amines to beta-amino alcohols (Table 2, entries 7a, 9a, 21b, 13a) at different mole% of Ni<sup>2+</sup>-G2 sepabeads EB-SP-400

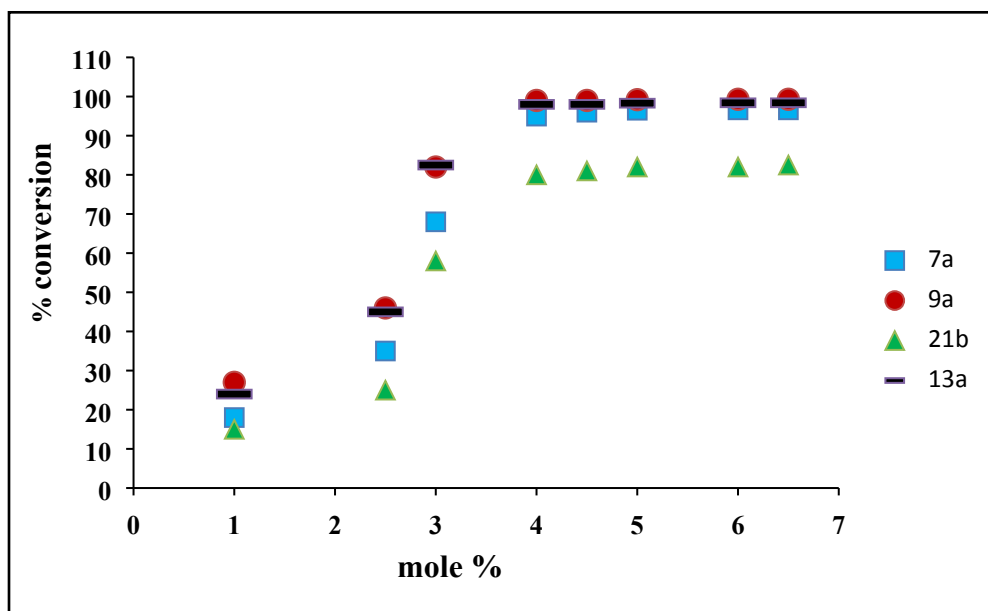

**D) Comparison of performance of various catalysts for ring opening of epoxides with amines**

| Entry | Amines                | Epoxides        | Catalyst                                            | Time (h) | Yield (%) | Ref       |
|-------|-----------------------|-----------------|-----------------------------------------------------|----------|-----------|-----------|
| 1     | Aniline               | Propylene oxide | Y(NO <sub>3</sub> ) <sub>3</sub> .6H <sub>2</sub> O | 3        | 75        | 25        |
| 2     | Aniline               | Propylene oxide | Sc(OTf) <sub>3</sub>                                | 3        | 95        | 21        |
| 3     | 2-Fluoroaniline       | Propylene oxide | Y(NO <sub>3</sub> ) <sub>3</sub> .6H <sub>2</sub> O | 3        | 81        | 25        |
| 4     | <i>o</i> -Toluidine   | Propylene oxide | Y(NO <sub>3</sub> ) <sub>3</sub> .6H <sub>2</sub> O | 3        | 90        | 25        |
| 5     | <i>p</i> -Anisidine   | Propylene oxide | Y(NO <sub>3</sub> ) <sub>3</sub> .6H <sub>2</sub> O | 3        | 72        | 25        |
| 6     | Aniline               | Epichlorohydrin | Y(NO <sub>3</sub> ) <sub>3</sub> .6H <sub>2</sub> O | 4        | 84        | 25        |
| 7     | Aniline               | Epichlorohydrin | NaY Zeolite                                         | 5        | 70        | 43        |
| 8     | Aniline               | Epichlorohydrin | Fe-MCM-41                                           | 2        | 98        | 26        |
| 9     | 2-Fluoroaniline       | Epichlorohydrin | Y(NO <sub>3</sub> ) <sub>3</sub> .6H <sub>2</sub> O | 4        | 82        | 25        |
| 10    | Aniline               | Styrene oxide   | B(C <sub>6</sub> F <sub>5</sub> ) <sub>3</sub>      | 2-4      | 90        | 23        |
| 11    | Aniline               | Styrene oxide   | [Bmim]BF <sub>4</sub>                               | 6.5      | 90        | 44        |
| 12    | 2-Fluoroaniline       | Styrene oxide   | Y(NO <sub>3</sub> ) <sub>3</sub> .6H <sub>2</sub> O | 3        | 89        | 25        |
| 13    | Amine                 | Epoxide         | nano Fe <sub>3</sub> O <sub>4</sub>                 | 20       | 70        | 47        |
| 14    | Aniline               | Epichlorohydrin | Ni <sup>+2</sup> -G2 Sepabeads                      | 0.5      | 97        | This work |
| 15    | <i>p</i> -Aminophenol | Epichlorohydrin | Ni <sup>+2</sup> -G2 Sepabeads                      | 1.0      | 99        | This Work |

**E) Calculation: Table.2 entries (1-21)**

$$\text{E factor} = \frac{\text{Total waste(mg)}}{\text{product(mg)}}$$

| Entry | Total waste(mg) | Product(mg) | E factor |
|-------|-----------------|-------------|----------|
| 1     | 12.0            | 88          | 0.136    |
| 2     | 5.0             | 95          | 0.052    |
| 3     | 7.0             | 93          | 0.075    |
| 4     | 4.0             | 96          | 0.041    |
| 5     | 6.0             | 94          | 0.063    |
| 6     | 2.0             | 98          | 0.020    |
| 7     | 4.0             | 96          | 0.041    |

|    |      |      |       |
|----|------|------|-------|
| 8  | 3.0  | 97   | 0.030 |
| 9  | 0.5  | 99.5 | 0.005 |
| 10 | 8.0  | 92   | 0.086 |
| 11 | 11.0 | 89   | 0.123 |
| 12 | 5.0  | 95   | 0.052 |
| 13 | 1.0  | 99   | 0.010 |
| 14 | 6.0  | 94   | 0.063 |
| 15 | 15.0 | 85   | 0.176 |
| 16 | 10.0 | 90   | 0.111 |
| 17 | 11.0 | 89   | 0.123 |
| 18 | 19.0 | 81   | 0.234 |
| 19 | 15.0 | 85   | 0.176 |
| 20 | 9.0  | 91   | 0.098 |
| 21 | 17.0 | 83   | 0.204 |

## F) Mass Spectra of some selected pure product

### *Aniline and epichlorohydrin*

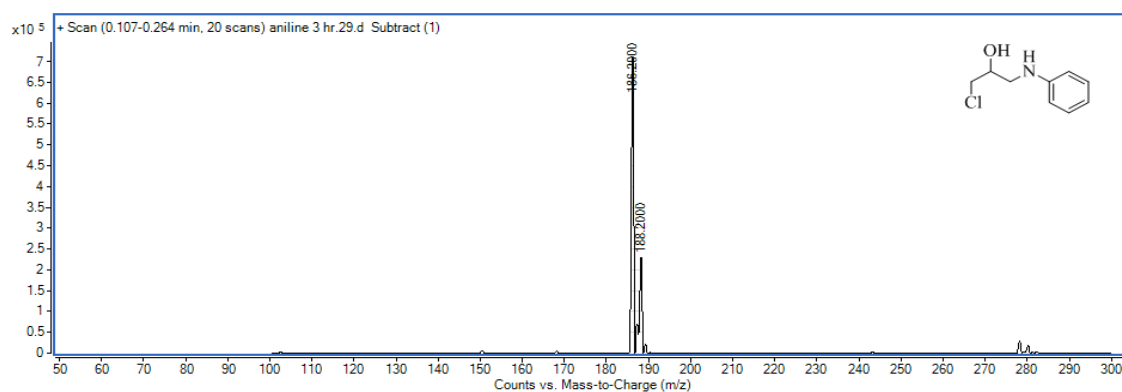

### *o-Toluidine and epichlorohydrin*

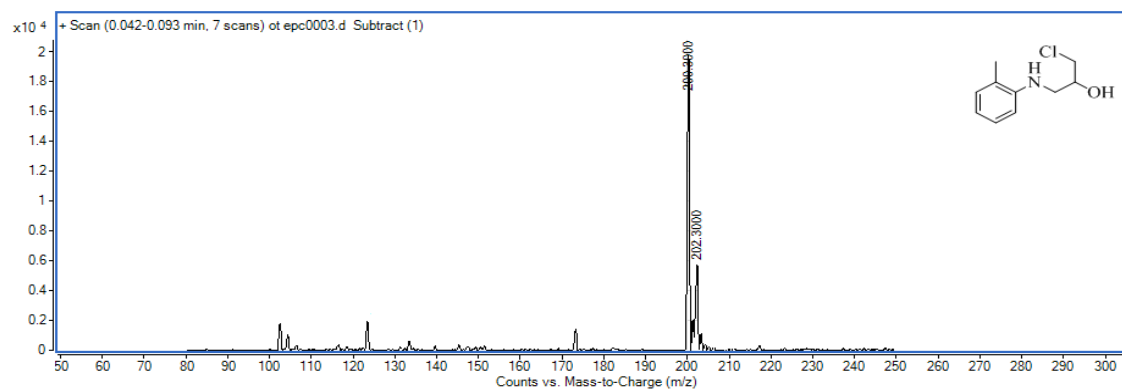

*p*-Anisidine and epichlorohydrin

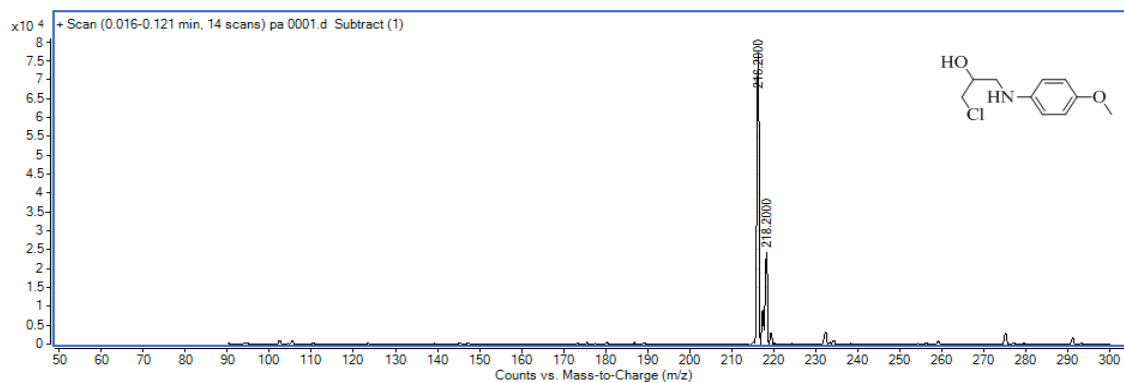

*o*-Amino phenol and epichlorohydrin

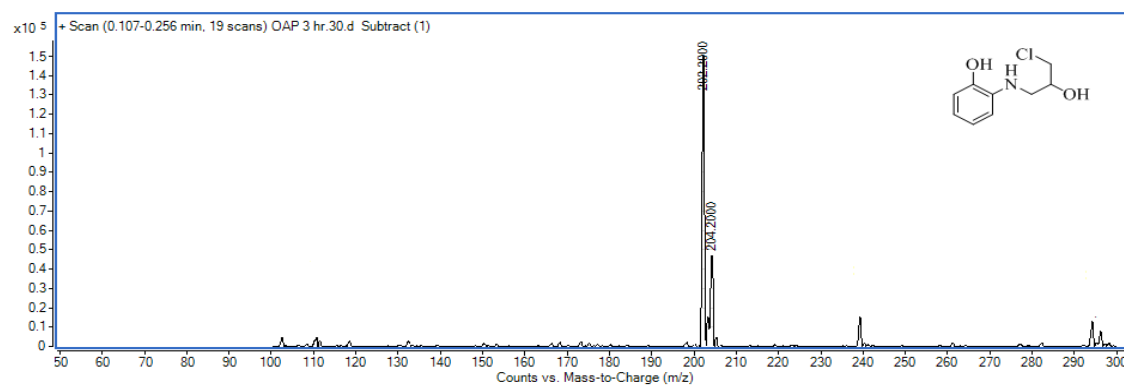

*m*-Toluidine and epichlorohydrin

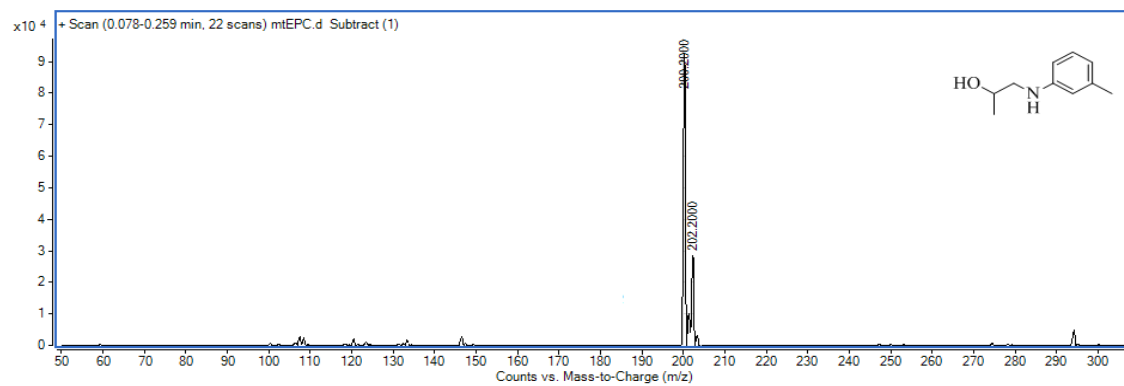

*Aniline and propylene oxide*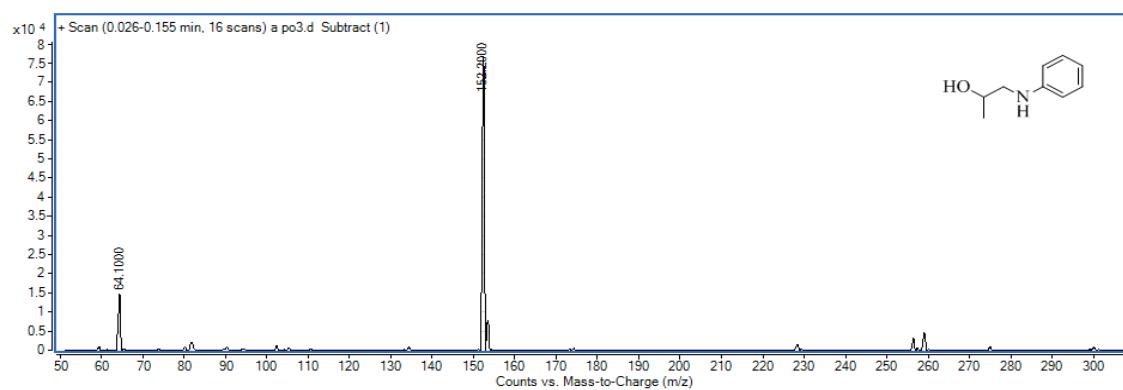*m-Toluidine and propylene oxide*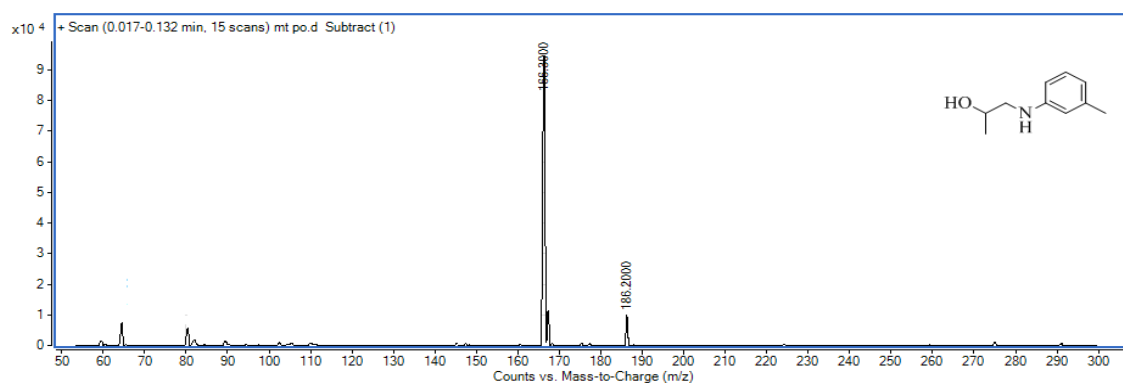*p-Anisidine and propylene oxide*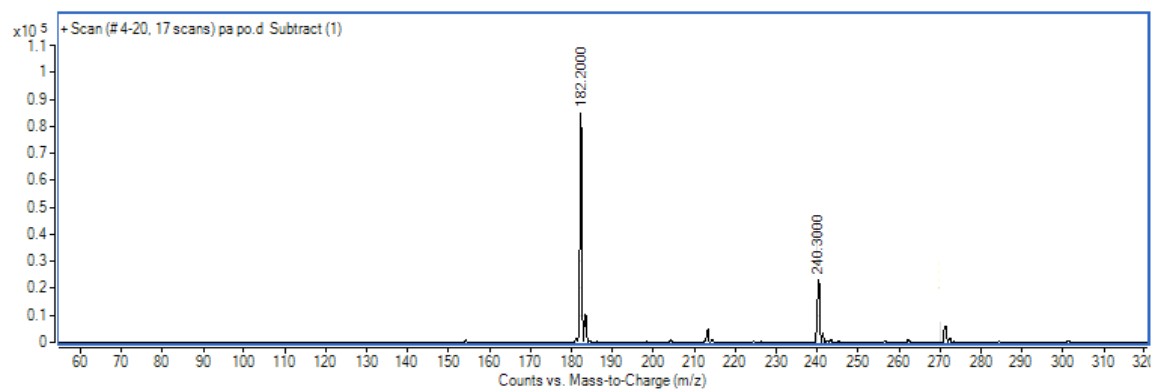



*p*-Anisidine and styrene oxide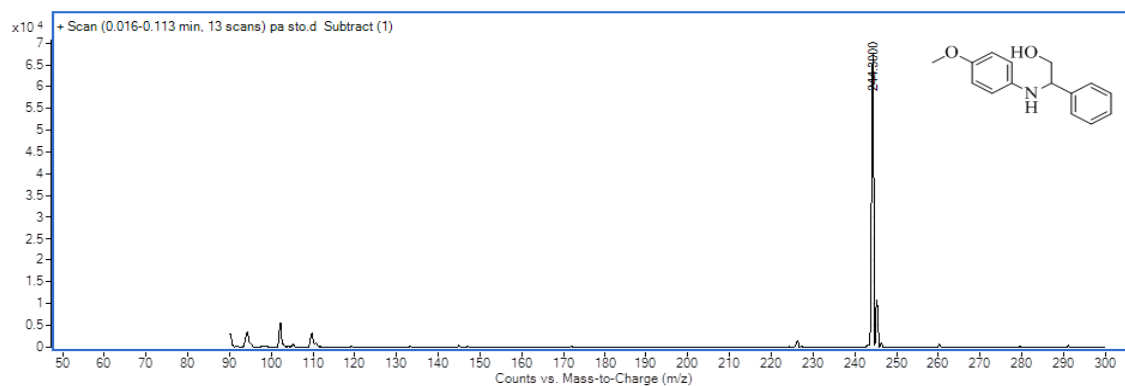*m*-Toluidine and styrene oxide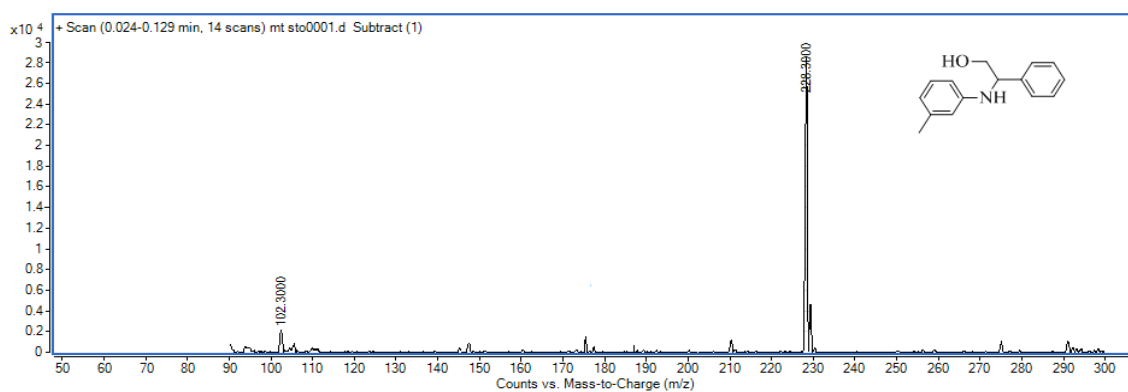G) Representative UV-Vis Spectra of Ni<sup>2+</sup> showing  $\lambda_{\max}$  of 390 nm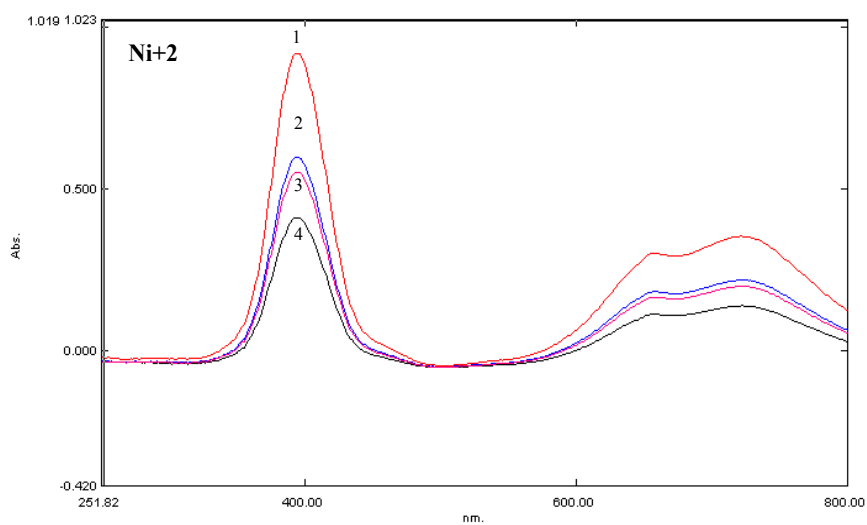

1. 0.5M conc. metal load, 2. G0-Sepabeads, 3. G1-Sepabeads, 4. G2-Sepabeads

UV-vis spectra are employed to determine the concentration of metal ions before and after contact of metal ion solution with the mesoporous polymethacrylate beads. The absorbance of solution was determined at wavelength maxima (e.g. for  $\text{Ni}^{2+}$  as nickel sulfate solution is it 340 nm) and metal ion concentration was calculated by comparing absorbance with concentration of respective standards. A suitable dilution of the solution is performed to get the absorbance between 0.1 to 0.9 and is used while calculating the concentrations. Such calculations were used to determine the capacity of adsorption for all metals on G0, G1 and G2 series of dendritic side groups grafted Sepabeads respectively. The decrease in absorbance was observed after the contact of  $\text{Ni}^{+2}$ ,  $\text{Co}^{+2}$ ,  $\text{Cu}^{+2}$  and  $\text{Fe}^{+2}$  metals ions with G0, G1, and G2 series of dendritic side groups grafted Sepabeads.
